# Supplementary material
Source: publisher figshare collection journal article supplement (https://gsajournals.figshare.com/ndownloader/files/28005741)
Supplement: Supplementary file 1 [file 28005741]

**Figure S4 Crossing scheme used to generate the *Dβ1-*TG4 strain**

All fly strains are described in Tables S1 and S2.
